# Supplementary material
Source: MDPI journal article supplement (https://www.mdpi.com/1996-1073/12/21/4205)
Supplement: s1 [file s1]

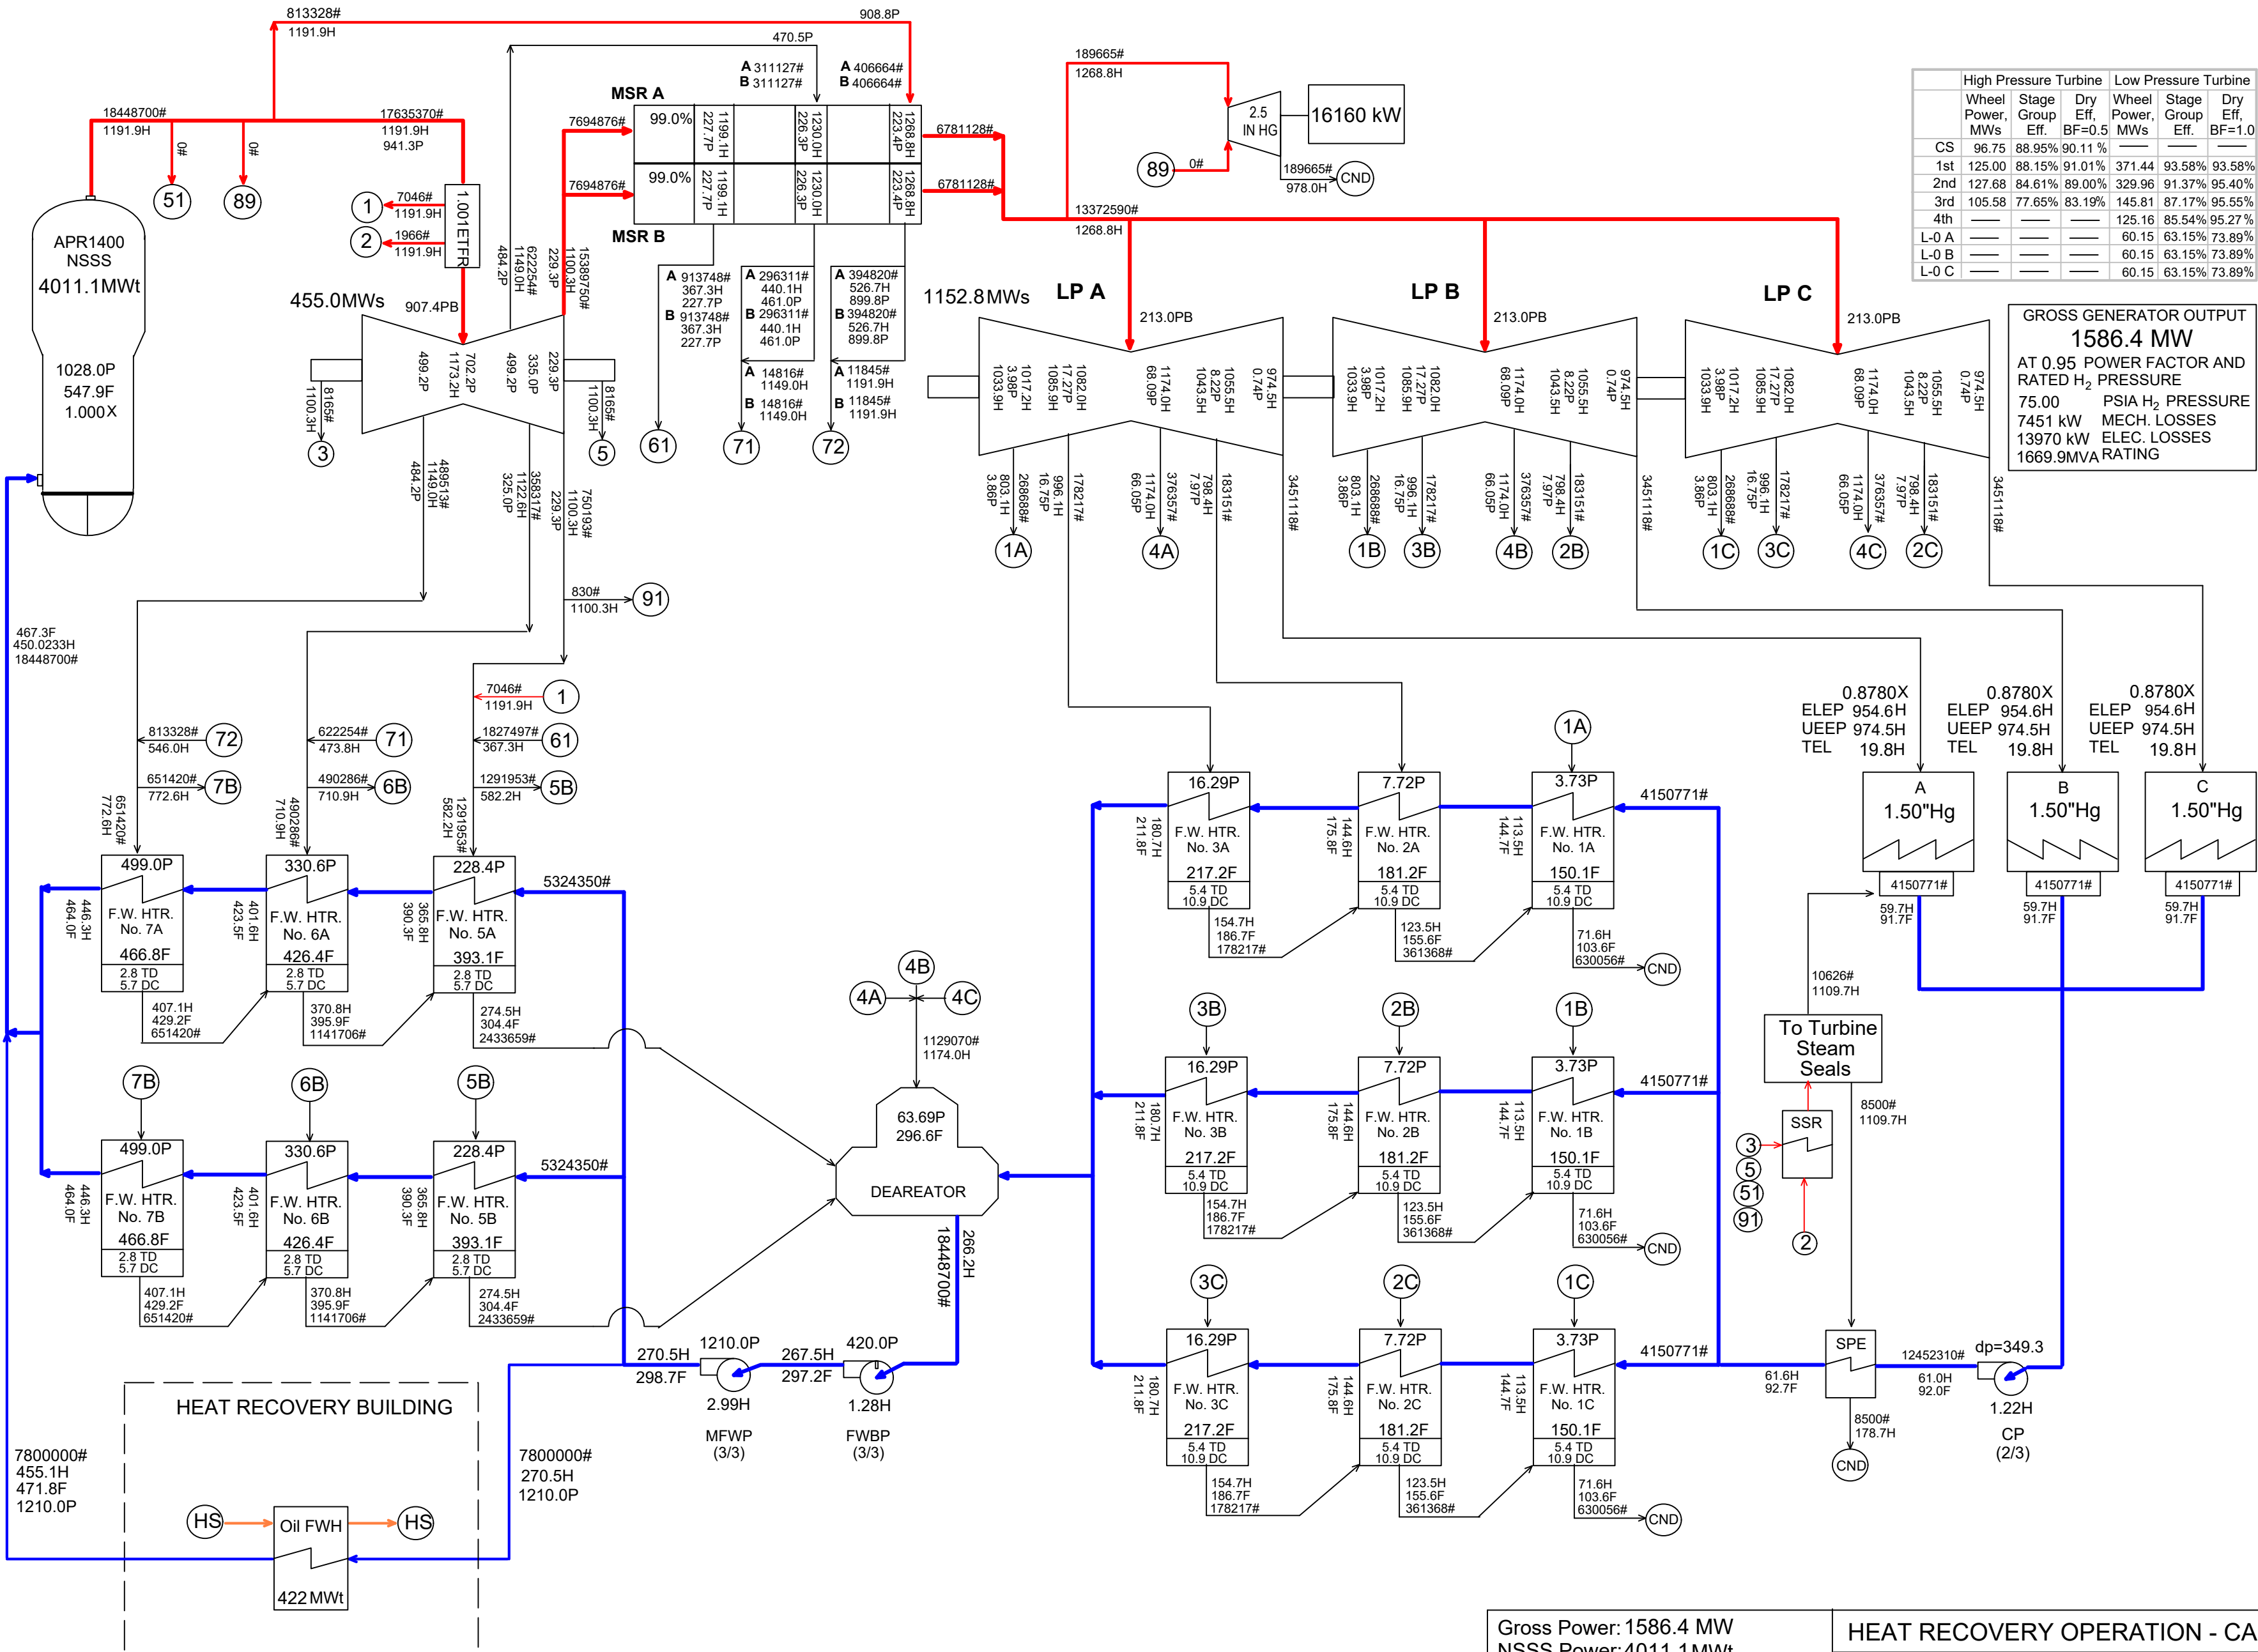

|       | High Pressure Turbine |                  |                 | Low Pressure Turbine |                  |                 |
|-------|-----------------------|------------------|-----------------|----------------------|------------------|-----------------|
|       | Wheel Power, MWs      | Stage Group Eff. | Dry Eff. BF=0.5 | Wheel Power, MWs     | Stage Group Eff. | Dry Eff. BF=1.0 |
| CS    | 96.75                 | 88.95%           | 90.11%          | —                    | —                | —               |
| 1st   | 125.00                | 88.15%           | 91.01%          | 371.44               | 93.58%           | 93.58%          |
| 2nd   | 127.68                | 84.61%           | 89.00%          | 329.96               | 91.37%           | 95.40%          |
| 3rd   | 105.58                | 77.65%           | 83.19%          | 145.81               | 87.17%           | 95.55%          |
| 4th   | —                     | —                | —               | 125.16               | 85.54%           | 95.27%          |
| L-O A | —                     | —                | —               | 60.15                | 63.15%           | 73.89%          |
| L-O B | —                     | —                | —               | 60.15                | 63.15%           | 73.89%          |
| L-O C | —                     | —                | —               | 60.15                | 63.15%           | 73.89%          |

GROSS GENERATOR OUTPUT  
**1586.4 MW**  
AT 0.95 POWER FACTOR AND  
RATED H<sub>2</sub> PRESSURE  
75.00 PSIA H<sub>2</sub> PRESSURE  
7451 kW MECH. LOSSES  
13970 kW ELEC. LOSSES  
1669.9MVA RATING

- NOTE:
- ASME 1967 Steam Tables.
  - Turbine performance is estimate, not guaranteed.
  - EFTR is estimated not guaranteed.
  - S/G, T/G, condenser, and feedwater heater performance assume clean conditions with 0% tube plugging.
  - Turbine and extraction arrangement is schematic only.
  - Feedwater heater vents are not modeled.
  - Scavenging steam modeled at 4.7% and 2.9% for 1st and 2nd stage reheater sections, respectively.
  - Cycle isolation is assumed. No fugitive, diversionary, bypass, or leakage flows are modeled (unless otherwise indicated).
  - S/G blowdown not modeled.
  - Generator power factor is used for computing variable losses. It should not be used in power flow calculations.
  - S/G leaving steam conditions are estimated based on Tcold=555°F.
  - Licensed thermal power is taken 3983 MWt with corresponding NSSS power taken as 4011.1 MWt.
  - The indicated HP turbine bowl pressure is for information. Control stage performance of the HP turbine is estimated based on partial are admission.
  - Feedwater heaters TTD and DCA are scaled with heater tube-side mass flow rates.
  - The pressure drops in Main Steam and Extraction Steam lines are modeled based on volumetric fow rate.

Gross Power: 1586.4 MW  
NSSS Power: 4011.1 MWt

Doosan T/G TC6F-52" LSB 1800 rpm  
PEPSE Version 82

HEAT RECOVERY OPERATION - CASE 3

P - pressure, psia  
F - temperature, °F  
H - enthalpy, Btu/lbm  
# - flow Rate, lbm/hr  
x - quality

MW - Megawatts  
MWs - Megawatts Shaft  
MWt - Megawatts Thermal  
B - British Thermal Units  
kWh - Kilowatt Hours

|              |                 |       |            |
|--------------|-----------------|-------|------------|
| Prepared by: | Anna M. Kluba   | Date: | 2019/07/16 |
| Reviewed by: | Robert M. Field | Date: | 2019/07/16 |
