# Supplementary material
Source: MDPI journal article supplement (https://www.mdpi.com/1996-1073/12/21/4205)
Supplement: s1 [file s1]

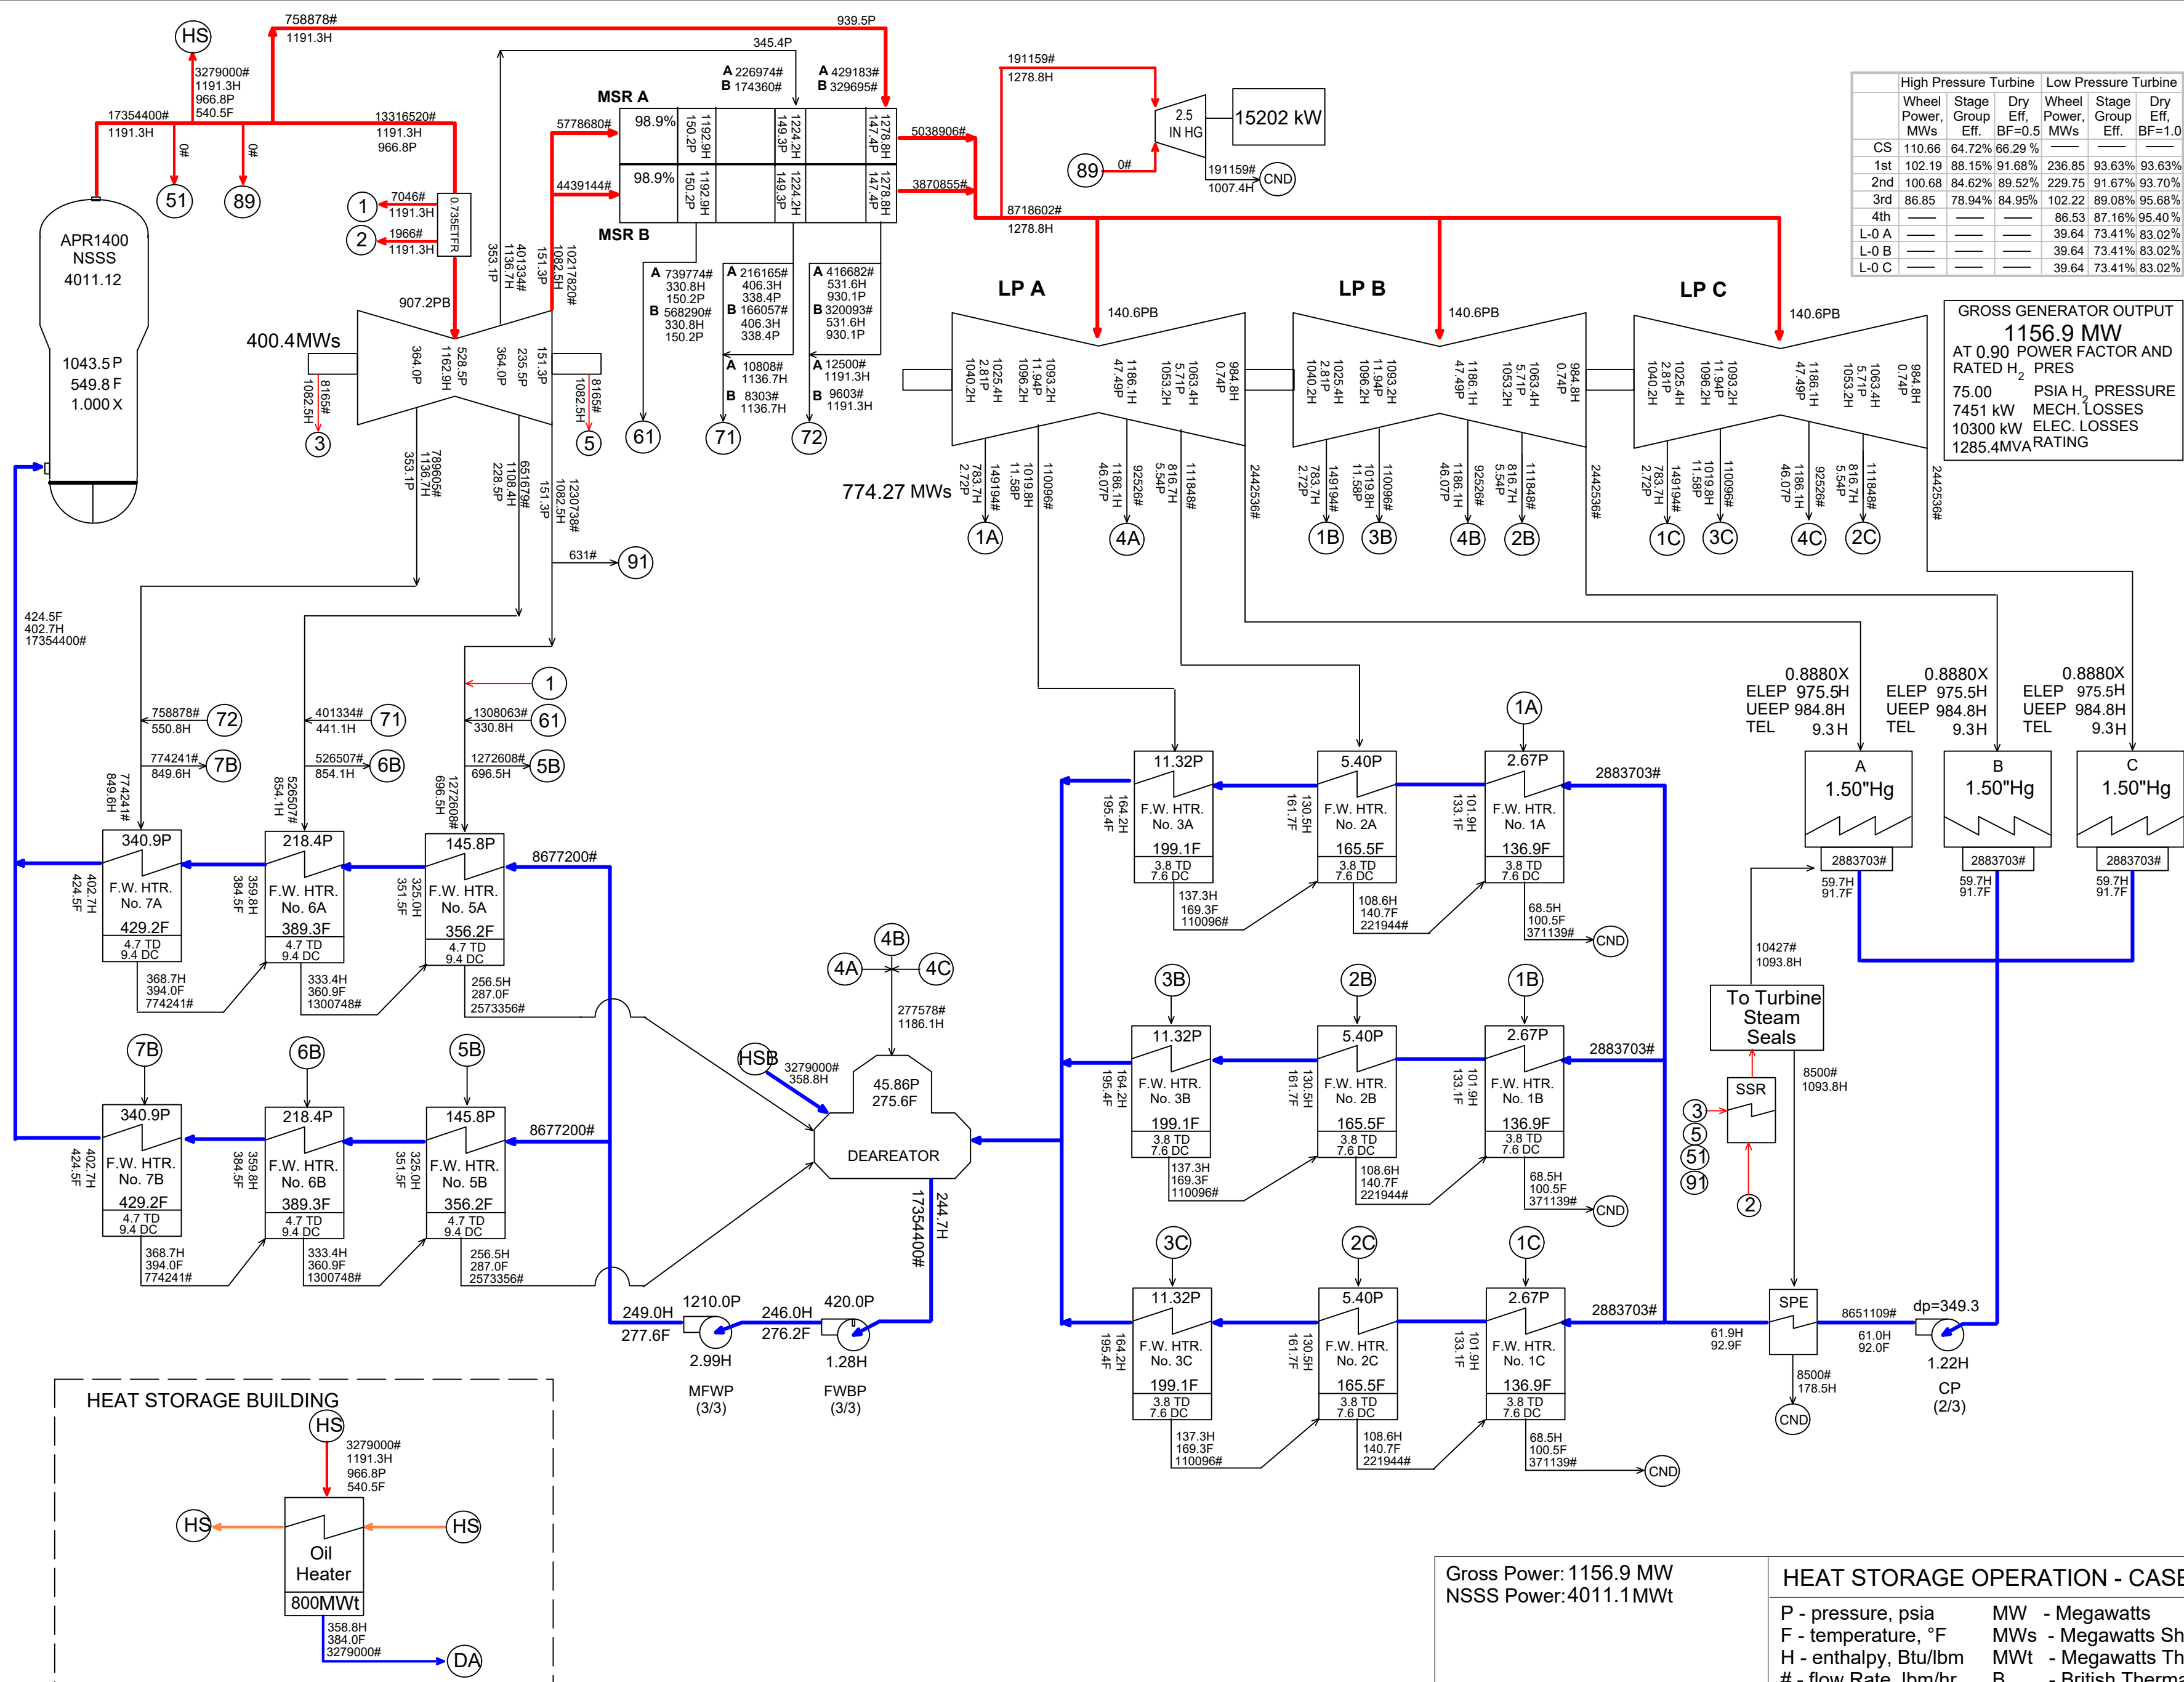

|       | High Pressure Turbine |                  |                 | Low Pressure Turbine |                  |                 |
|-------|-----------------------|------------------|-----------------|----------------------|------------------|-----------------|
|       | Wheel Power, MWs      | Stage Group Eff. | Dry Eff, BF=0.5 | Wheel Power, MWs     | Stage Group Eff. | Dry Eff, BF=1.0 |
| CS    | 110.66                | 64.72%           | 66.29 %         | 236.85               | 93.63%           | 93.63%          |
| 1st   | 102.19                | 88.15%           | 91.68 %         | 229.75               | 91.67%           | 93.70%          |
| 2nd   | 100.68                | 84.62%           | 89.52 %         | 102.22               | 89.08%           | 95.68%          |
| 3rd   | 86.85                 | 78.94%           | 84.95 %         | 86.53                | 87.16%           | 95.40 %         |
| 4th   | ---                   | ---              | ---             | 39.64                | 73.41%           | 83.02%          |
| L-0 A | ---                   | ---              | ---             | 39.64                | 73.41%           | 83.02%          |
| L-0 B | ---                   | ---              | ---             | 39.64                | 73.41%           | 83.02%          |
| L-0 C | ---                   | ---              | ---             | 39.64                | 73.41%           | 83.02%          |

GROSS GENERATOR OUTPUT  
1156.9 MW  
AT 0.90 POWER FACTOR AND  
RATED H<sub>2</sub> PRES  
75.00 PSIA H<sub>2</sub> PRESSURE  
7451 kW MECH. LOSSES  
10300 kW ELEC. LOSSES  
1285.4MVA RATING

- NOTE:
- ASME 1967 Steam Tables.
  - Turbine performance is estimate, not guaranteed.
  - EFTR is estimated not guaranteed.
  - S/G, T/G, condenser, and feedwater heater performance assume clean conditions with 0% tube plugging.
  - Turbine and extraction arrangement is schematic only.
  - Feedwater heater vents are not modeled.
  - Scavenging steam modeled at 4.7% and 2.9% for 1st and 2nd stage reheater sections, respectively.
  - Cycle isolation is assumed. No fugitive, diversionary, bypass, or leakage flows are modeled (unless otherwise indicated).
  - S/G blowdown not modeled.
  - Generator power factor is used for computing variable losses. It should not be used in power flow calculations.
  - S/G leaving steam conditions are estimated based on Tcold=555°F.
  - Licensed thermal power is taken 3983 MWt with corresponding NSSS power taken as 4011.1 MWt.
  - The indicated HP turbine bowl pressure is for information. Control stage performance of the HP turbine is estimated based on partial admission.
  - Feedwater heaters TTD and DCA are scaled with heater tube-side mass flow rates.
  - The pressure drops in Main Steam and Extraction Steam lines are modeled based on volumetric fow rate.

Gross Power: 1156.9 MW  
NSSS Power: 4011.1MWt

Doosan T/G TC6F-52" LSB 1800 rpm  
PEPSE Version 82

#### HEAT STORAGE OPERATION - CASE 2

P - pressure, psia  
F - temperature, °F  
H - enthalpy, Btu/lbm  
# - flow Rate, lbm/hr  
x - quality

MW - Megawatts  
MWs - Megawatts Shaft  
MWt - Megawatts Thermal  
B - British Thermal Units  
kWh - Kilowatt Hours

|                 |            |
|-----------------|------------|
| Prepared by:    | Date:      |
| Anna M. Kluba   | 2019/07/19 |
| Reviewed by:    | Date:      |
| Robert M. Field | 2019/07/19 |
