# Supplementary material
Source: MDPI journal article supplement (https://www.mdpi.com/1996-1073/12/21/4205)
Supplement: s1 [file s1]

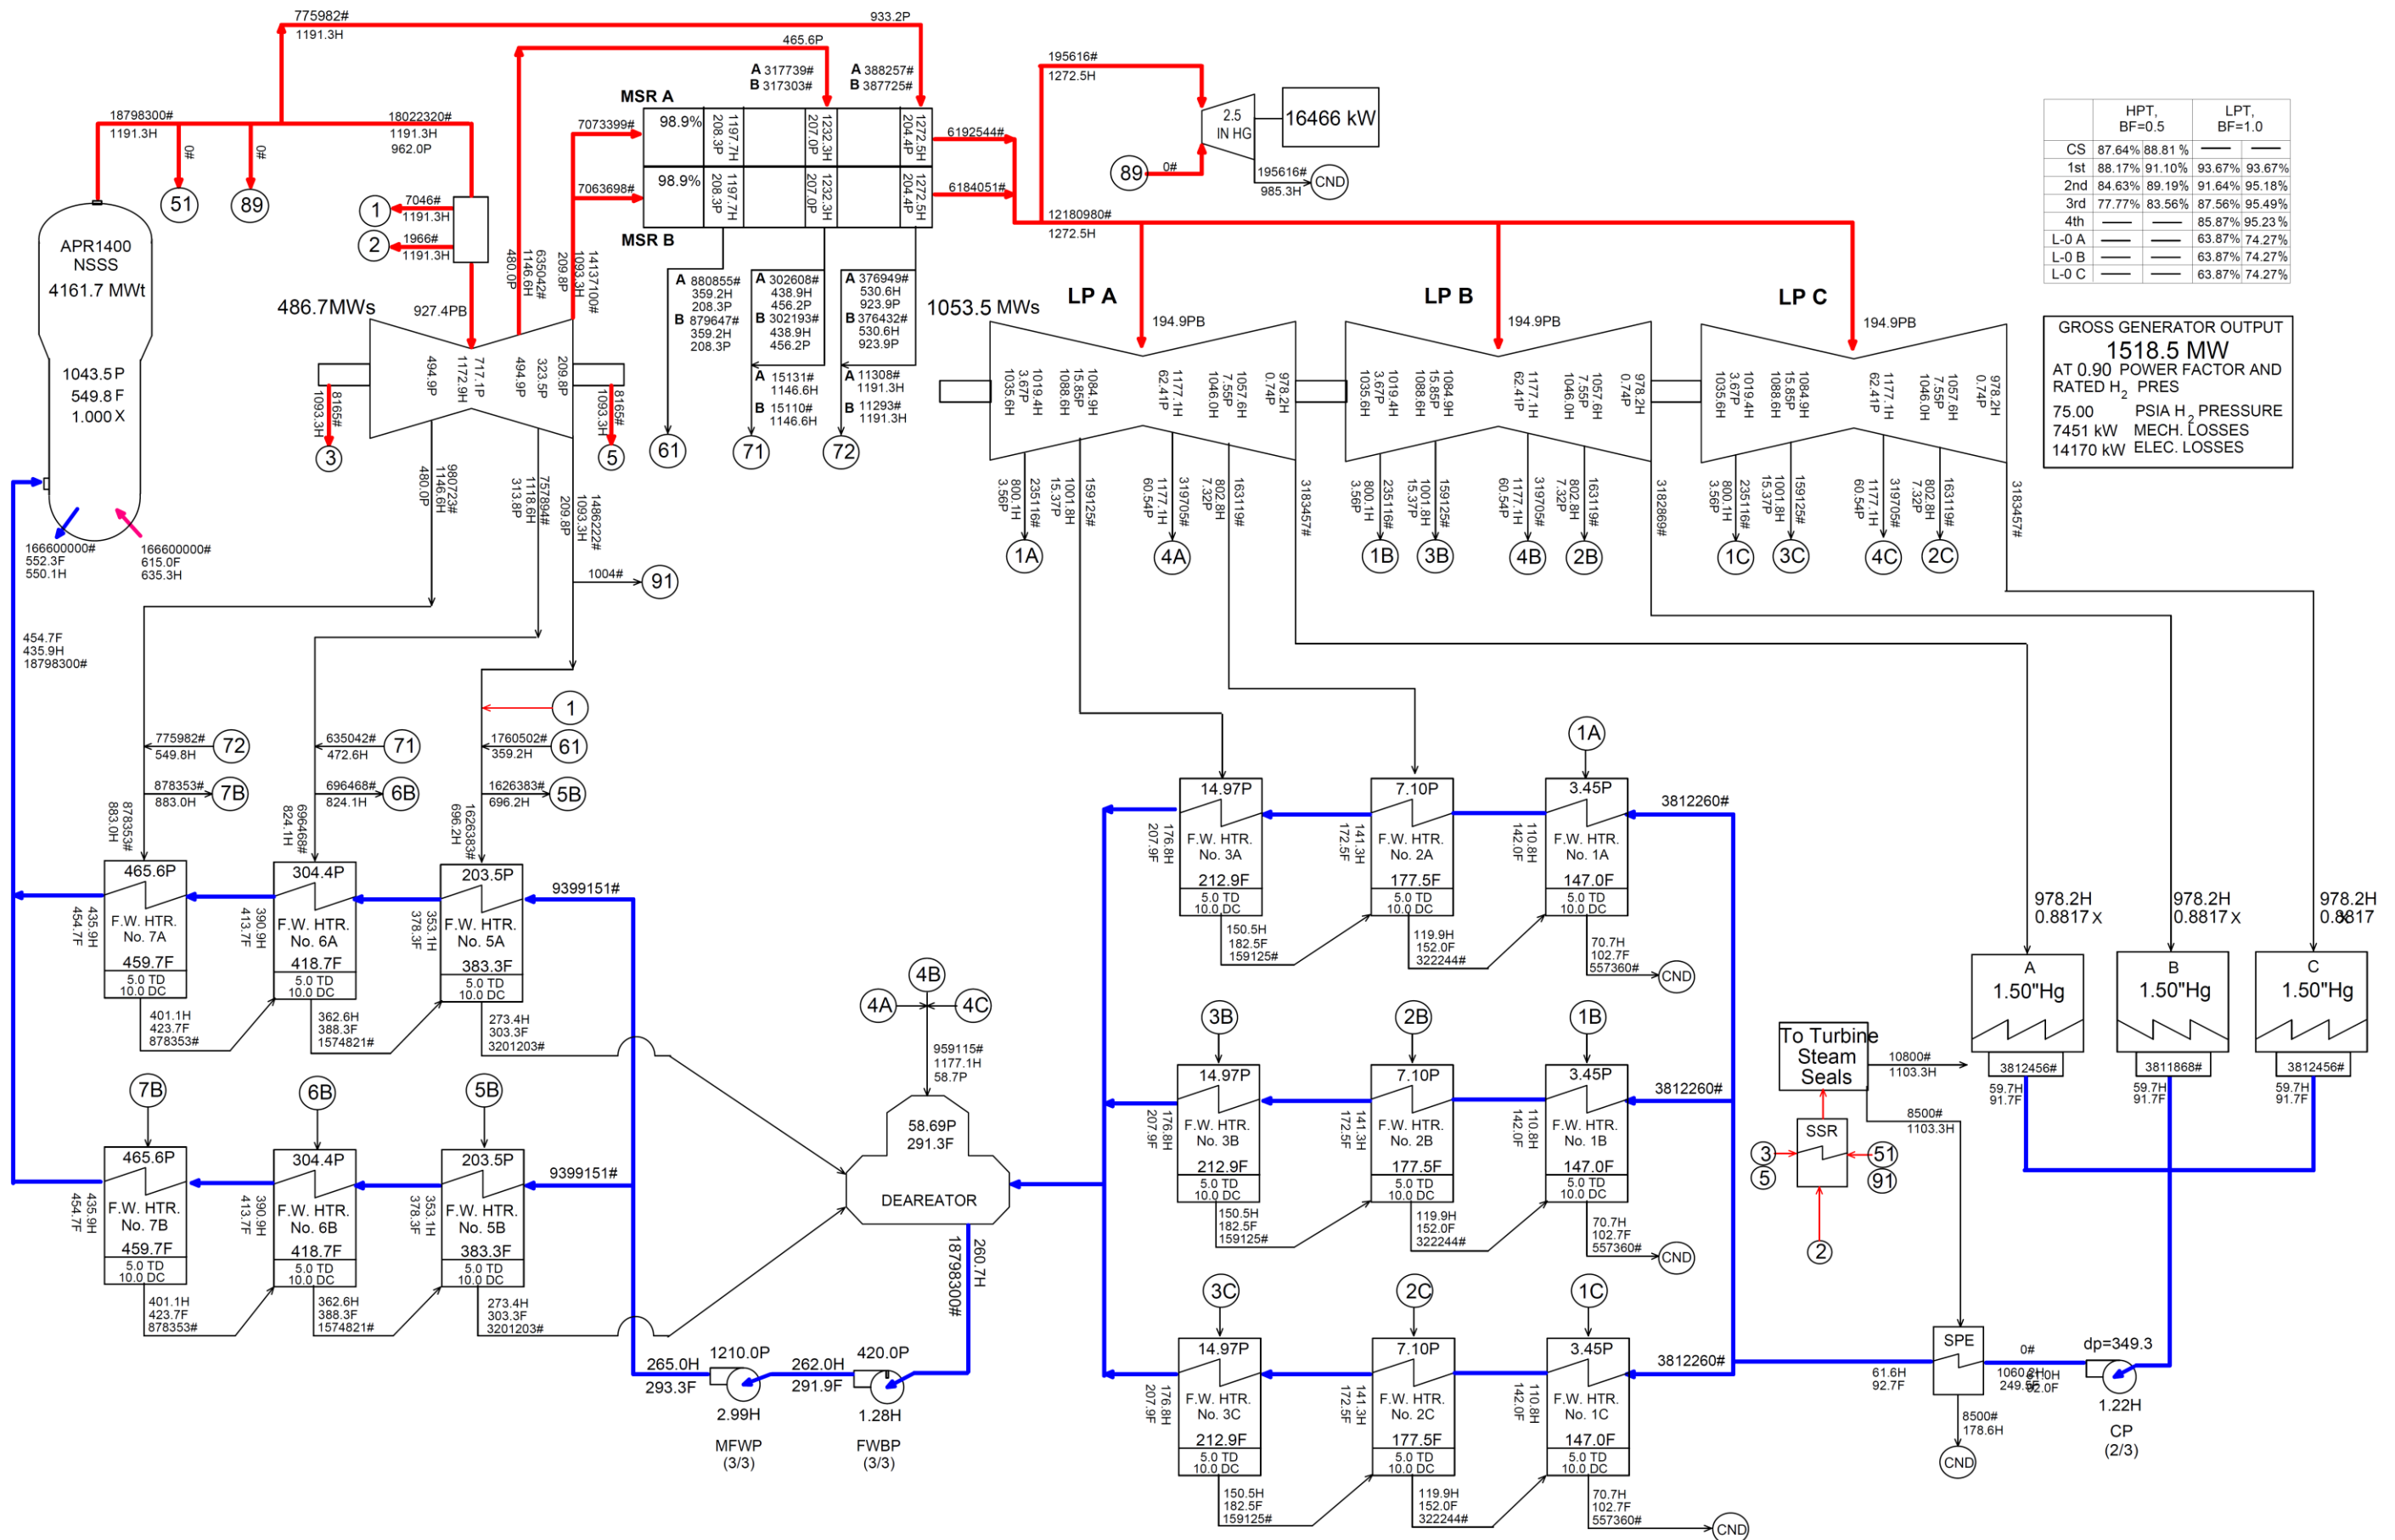

|       | HPT,<br>BF=0.5 | LPT,<br>BF=1.0 |
|-------|----------------|----------------|
| CS    | 87.64%         | 88.81%         |
| 1st   | 88.17%         | 91.10%         |
| 2nd   | 84.63%         | 89.19%         |
| 3rd   | 77.77%         | 83.56%         |
| 4th   | —              | 85.87%         |
| L-0 A | —              | 63.87%         |
| L-0 B | —              | 63.87%         |
| L-0 C | —              | 63.87%         |

GROSS GENERATOR OUTPUT  
**1518.5 MW**  
AT 0.90 POWER FACTOR AND  
RATED H<sub>2</sub> PRES  
75.00 PSIA H<sub>2</sub> PRESSURE  
7451 kW MECH. LOSSES  
14170 kW ELEC. LOSSES

Gross Power: 1518.5 MW  
NSSS Power: 4161.7 MWt

VVO 0.0%MU ENGLISH

P - Pressure, psia  
F - Temperature, F  
H - Enthalpy, Btu/lbm  
# - Flow Rate, lbm/hr  
x - Quality  
MW - Megawatts  
MWs - Megawatts Shaft  
MWt - Megawatts Thermal  
B - British Thermal Units  
kWh - Kilowatt Hours

Prepared by: Anna Kluba

Date: 5/7/2019

Reviewed by: Robert M. Field

Date: 5/7/2019

- Notes:
1. Unless specifically noted, flow rates are totals for parallel trains.
  2. Only one LP Turbine is included in the heat balance model except for the last stage which is modeled seperately for the three trains.
  3. All outflows to 'CND' return to the Condenser
  4. Indicated flow paths are representational from a thermodynamic perspective. For component and equipment evaluations, the flows within the cycle may include parallel paths or more detailed configurations and should be based on actual system routing (P&IDs)

PEPSE Version  
82/GT (67 STEAM TABLES) of 18 OC 17
