# Supplementary material
Source: MDPI journal article supplement (https://www.mdpi.com/1996-1073/12/21/4205)
Supplement: s1 [file s1]

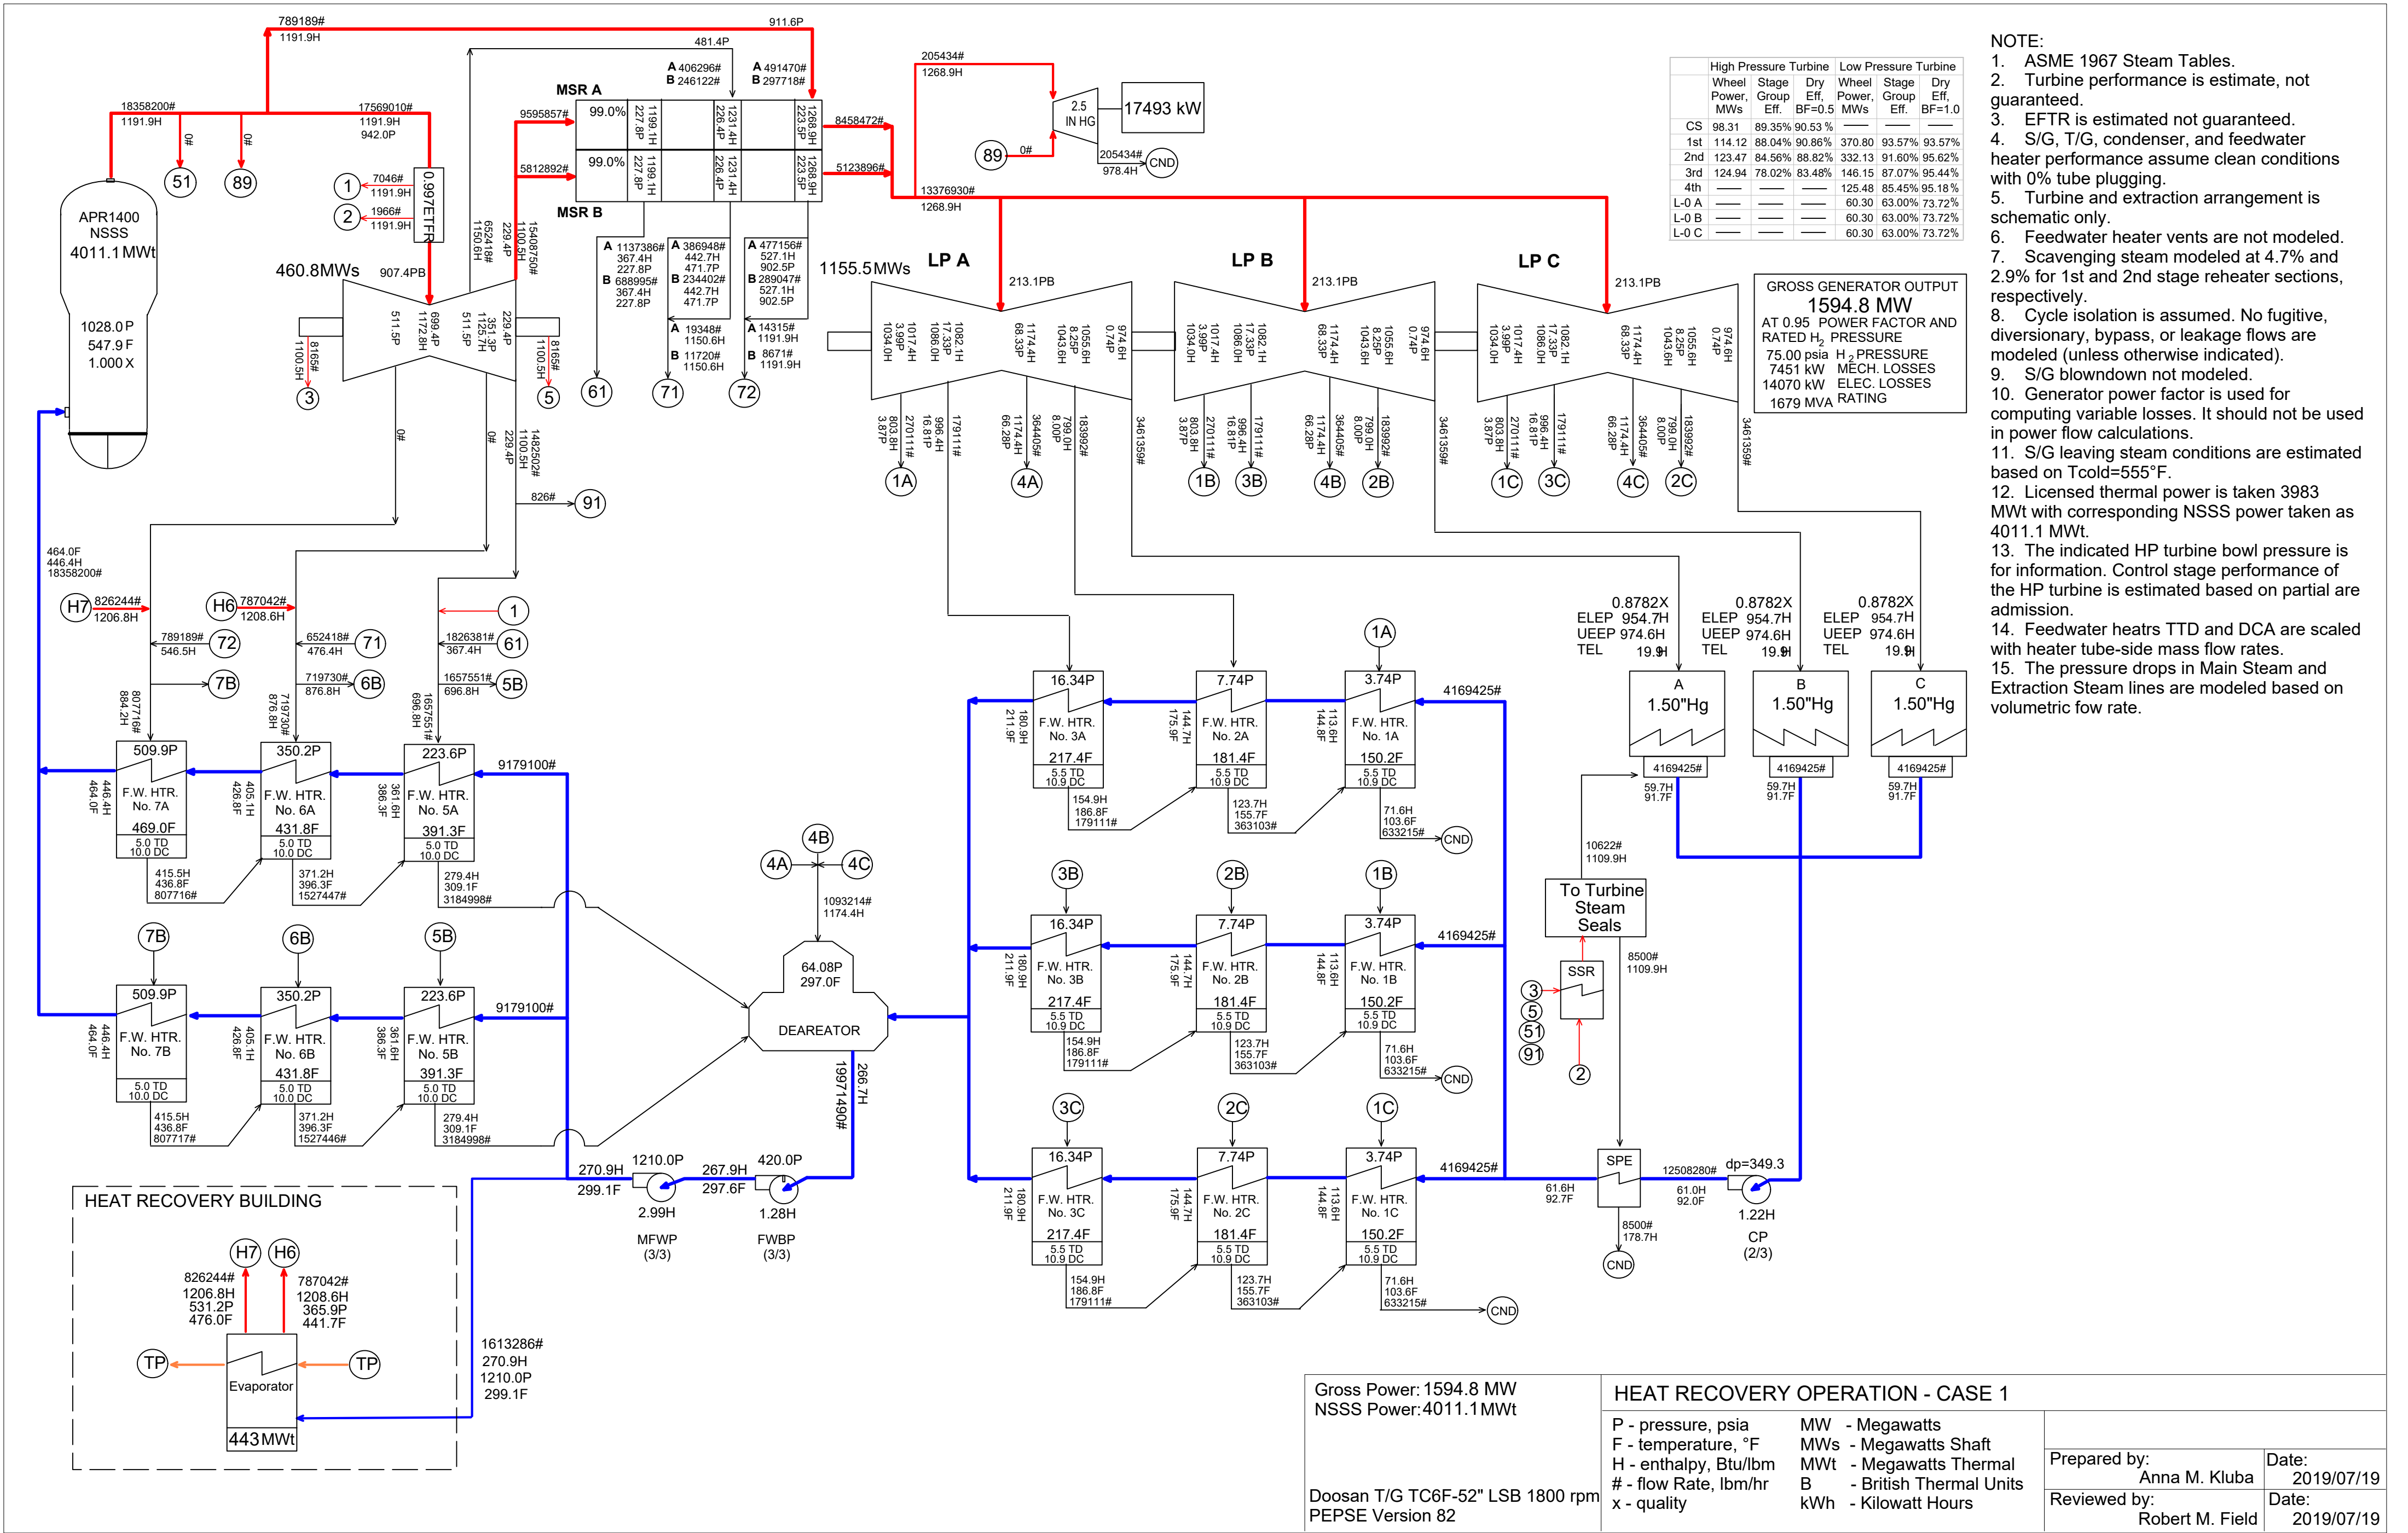

|       | High Pressure Turbine |                  |                 | Low Pressure Turbine |                  |                 |
|-------|-----------------------|------------------|-----------------|----------------------|------------------|-----------------|
|       | Wheel Power, MWs      | Stage Group Eff. | Dry Eff. BF=0.5 | Wheel Power, MWs     | Stage Group Eff. | Dry Eff. BF=1.0 |
| CS    | 98.31                 | 89.35%           | 90.53 %         | —                    | —                | —               |
| 1st   | 114.12                | 88.04%           | 90.86%          | 370.80               | 93.57%           | 93.57%          |
| 2nd   | 123.47                | 84.56%           | 88.82%          | 332.13               | 91.60%           | 95.62%          |
| 3rd   | 124.94                | 78.02%           | 83.48%          | 146.15               | 87.07%           | 95.44%          |
| 4th   | —                     | —                | —               | 125.48               | 85.45%           | 95.18%          |
| L-0 A | —                     | —                | —               | 60.30                | 63.00%           | 73.72%          |
| L-0 B | —                     | —                | —               | 60.30                | 63.00%           | 73.72%          |
| L-0 C | —                     | —                | —               | 60.30                | 63.00%           | 73.72%          |

- NOTE:
- ASME 1967 Steam Tables.
  - Turbine performance is estimate, not guaranteed.
  - EFTR is estimated not guaranteed.
  - S/G, T/G, condenser, and feedwater heater performance assume clean conditions with 0% tube plugging.
  - Turbine and extraction arrangement is schematic only.
  - Feedwater heater vents are not modeled.
  - Scavenging steam modeled at 4.7% and 2.9% for 1st and 2nd stage reheater sections, respectively.
  - Cycle isolation is assumed. No fugitive, diversionary, bypass, or leakage flows are modeled (unless otherwise indicated).
  - S/G blowdown not modeled.
  - Generator power factor is used for computing variable losses. It should not be used in power flow calculations.
  - S/G leaving steam conditions are estimated based on Tcold=555°F.
  - Licensed thermal power is taken 3983 MWt with corresponding NSSS power taken as 4011.1 MWt.
  - The indicated HP turbine bowl pressure is for information. Control stage performance of the HP turbine is estimated based on partial are admission.
  - Feedwater heaters TTD and DCA are scaled with heater tube-side mass flow rates.
  - The pressure drops in Main Steam and Extraction Steam lines are modeled based on volumetric fow rate.
