# Supplementary material
Source: MDPI journal article supplement (https://www.mdpi.com/1996-1073/12/21/4205)
Supplement: s1 [file s1]

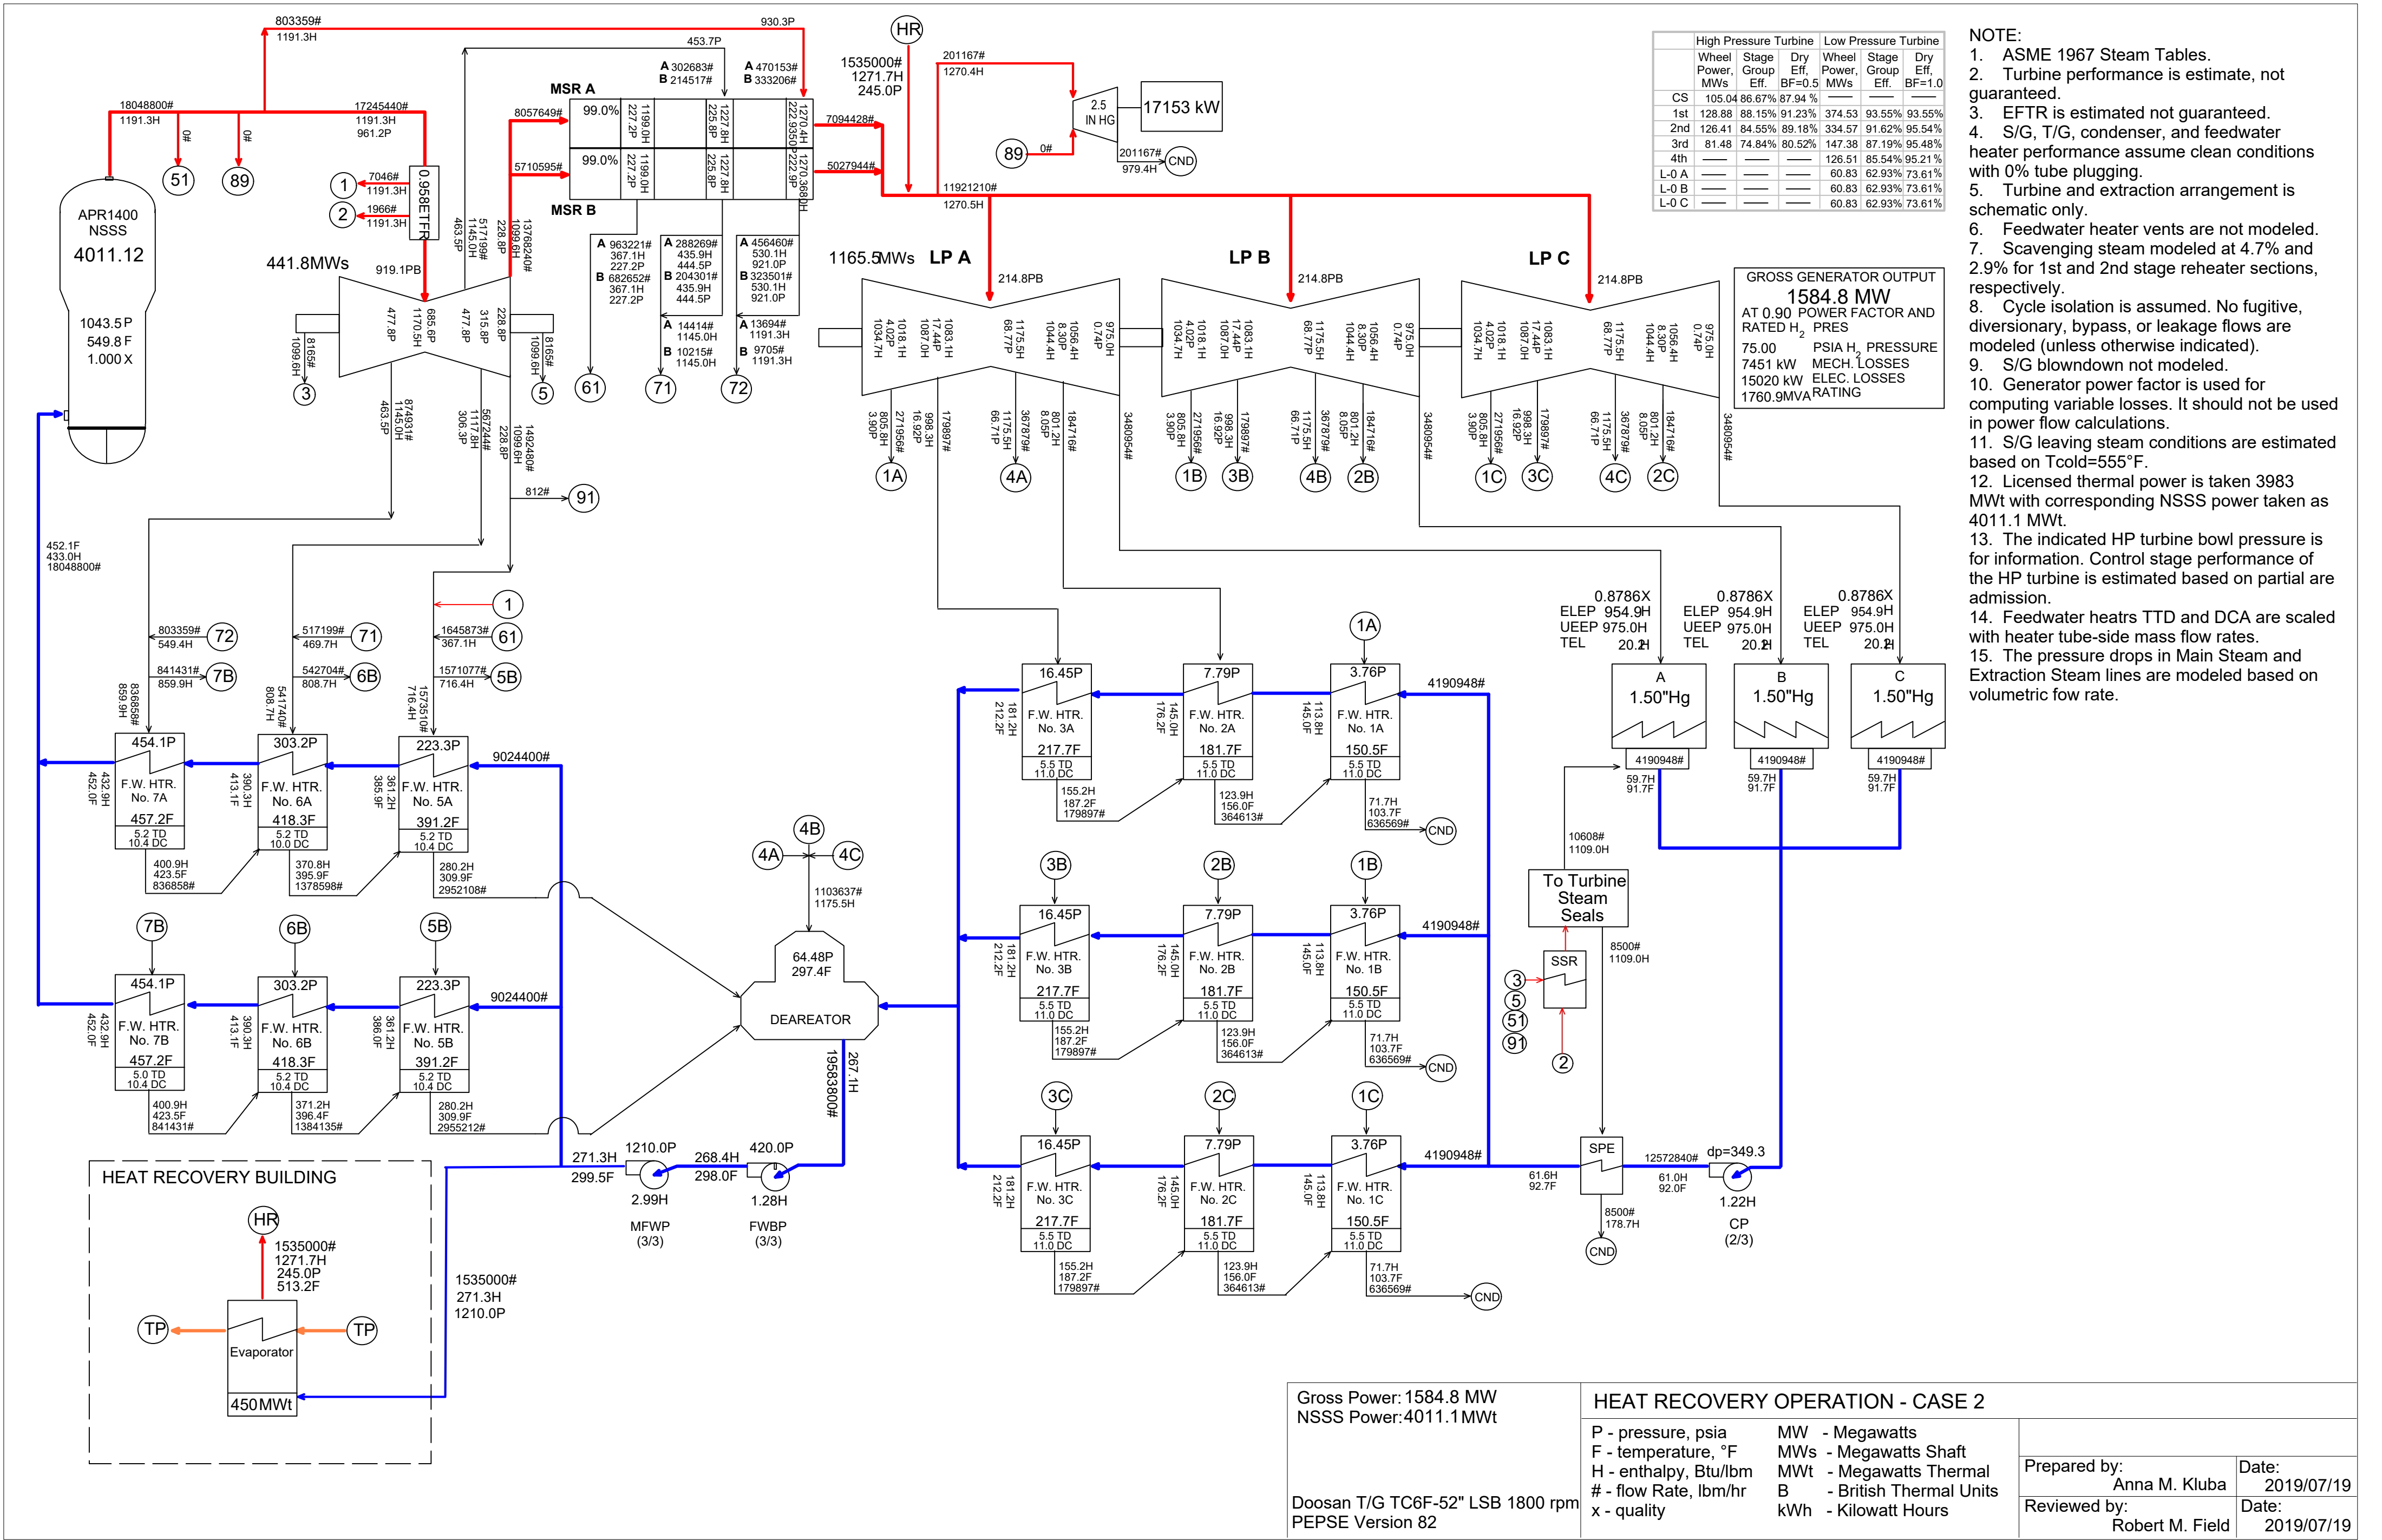

|       | High Pressure Turbine |                  |                 | Low Pressure Turbine |                  |                 |
|-------|-----------------------|------------------|-----------------|----------------------|------------------|-----------------|
|       | Wheel Power, MWs      | Stage Group Eff. | Dry Eff. BF=0.5 | Wheel Power, MWs     | Stage Group Eff. | Dry Eff. BF=1.0 |
| CS    | 105.04                | 86.67%           | 87.94 %         | —                    | —                | —               |
| 1st   | 128.88                | 88.15%           | 91.23%          | 374.53               | 93.55%           | 93.55%          |
| 2nd   | 126.41                | 84.55%           | 89.18%          | 334.57               | 91.62%           | 95.54%          |
| 3rd   | 81.48                 | 74.84%           | 80.52%          | 147.38               | 87.19%           | 95.48%          |
| 4th   | —                     | —                | —               | 126.51               | 85.54%           | 95.21 %         |
| L-0 A | —                     | —                | —               | 60.83                | 62.93%           | 73.61%          |
| L-0 B | —                     | —                | —               | 60.83                | 62.93%           | 73.61%          |
| L-0 C | —                     | —                | —               | 60.83                | 62.93%           | 73.61%          |

- NOTE:
- ASME 1967 Steam Tables.
  - Turbine performance is estimate, not guaranteed.
  - EFTR is estimated not guaranteed.
  - S/G, T/G, condenser, and feedwater heater performance assume clean conditions with 0% tube plugging.
  - Turbine and extraction arrangement is schematic only.
  - Feedwater heater vents are not modeled.
  - Scavenging steam modeled at 4.7% and 2.9% for 1st and 2nd stage reheater sections, respectively.
  - Cycle isolation is assumed. No fugitive, diversionary, bypass, or leakage flows are modeled (unless otherwise indicated).
  - S/G blowdown not modeled.
  - Generator power factor is used for computing variable losses. It should not be used in power flow calculations.
  - S/G leaving steam conditions are estimated based on Tcold=555°F.
  - Licensed thermal power is taken 3983 MWt with corresponding NSSS power taken as 4011.1 MWt.
  - The indicated HP turbine bowl pressure is for information. Control stage performance of the HP turbine is estimated based on partial admission.
  - Feedwater heaters TTD and DCA are scaled with heater tube-side mass flow rates.
  - The pressure drops in Main Steam and Extraction Steam lines are modeled based on volumetric fow rate.

Gross Power: 1584.8 MW  
NSSS Power: 4011.1 MWt

Doosan T/G TC6F-52" LSB 1800 rpm  
PEPSE Version 82

#### HEAT RECOVERY OPERATION - CASE 2

P - pressure, psia  
F - temperature, °F  
H - enthalpy, Btu/lbm  
# - flow Rate, lbm/hr  
x - quality

MW - Megawatts  
MWs - Megawatts Shaft  
MWt - Megawatts Thermal  
B - British Thermal Units  
kWh - Kilowatt Hours

|              |                 |       |            |
|--------------|-----------------|-------|------------|
| Prepared by: | Anna M. Kluba   | Date: | 2019/07/19 |
| Reviewed by: | Robert M. Field | Date: | 2019/07/19 |
